# Supplementary material for: Cohort profile: the Johns Hopkins COVID Long Study (JHCLS)—a US nationwide prospective cohort study
Source: PubMed Central journal article supplement — BMJ Open. 2024 Jun 19;14(6):e077742. doi: 10.1136/bmjopen-2023-077742 (PMC11191784; doi:10.1136/bmjopen-2023-077742), 2024-06-19
Supplement: bmjopen-2023-077742supp002.pdf [file bmjopen-2023-077742supp002.pdf]

**Supplementary Table 2** Comparison of baseline demographic and clinical characteristics among participants with SARS-CoV-2 infection who agreed and declined to be contacted for future studies<sup>1,2,3,4</sup>

|                                                     | Agreed to be Contacted<br>for Future Studies<br>(n = 11,924) | Declined to be Contacted<br>for Future Studies<br>(n = 3,554) |
|-----------------------------------------------------|--------------------------------------------------------------|---------------------------------------------------------------|
| Gender                                              |                                                              |                                                               |
| Cisgender man                                       | 1,829 (15%)                                                  | 510 (14%)                                                     |
| Cisgender woman                                     | 9,934 (83%)                                                  | 2,992 (84%)                                                   |
| Transgender man                                     | 15 (0.1%)                                                    | 6 (0.2%)                                                      |
| Transgender woman                                   | 11 (0.1%)                                                    | 1 (<0.1%)                                                     |
| Different identity                                  | 127 (1.1%)                                                   | 36 (1.0%)                                                     |
| Missing                                             | 8                                                            | 9                                                             |
| Race                                                |                                                              |                                                               |
| White                                               | 10,538 (89%)                                                 | 3,067 (88%)                                                   |
| Black                                               | 348 (2.9%)                                                   | 88 (2.5%)                                                     |
| Other                                               | 563 (4.8%)                                                   | 213 (6.1%)                                                    |
| Mixed race                                          | 384 (3.3%)                                                   | 117 (3.4%)                                                    |
| Missing                                             | 91                                                           | 69                                                            |
| Hispanic, Latino or Spanish origin                  | 892 (7.5%)                                                   | 289 (8.2%)                                                    |
| Missing                                             | 68                                                           | 35                                                            |
| Median age, IQR                                     | 46 (36,57)                                                   | 42 (33,52)                                                    |
| Missing                                             | 34                                                           | 6                                                             |
| Educational attainment                              |                                                              |                                                               |
| High school, GED, or less                           | 620 (5.2%)                                                   | 243 (6.9%)                                                    |
| Some college, Associates/technical degree           | 3,009 (25%)                                                  | 823 (23%)                                                     |
| Bachelor's degree                                   | 3,601 (30%)                                                  | 1,116 (32%)                                                   |
| Post-graduate degree                                | 4,676 (39%)                                                  | 1,356 (38%)                                                   |
| Missing                                             | 18                                                           | 16                                                            |
| Annual household income                             |                                                              |                                                               |
| <\$25,000                                           | 1,163 (11%)                                                  | 394 (13%)                                                     |
| \$25,000 - \$34,999                                 | 712 (6.5%)                                                   | 227 (7.4%)                                                    |
| \$35,000 - \$49,999                                 | 1,125 (10%)                                                  | 328 (11%)                                                     |
| \$50,000 - \$74,999                                 | 2,084 (19%)                                                  | 576 (19%)                                                     |
| \$75,000 or greater                                 | 5,939 (54%)                                                  | 1,540 (50%)                                                   |
| Missing                                             | 901                                                          | 489                                                           |
| Region                                              |                                                              |                                                               |
| Northeast                                           | 2,216 (19%)                                                  | 679 (19%)                                                     |
| Midwest                                             | 2,383 (20%)                                                  | 810 (23%)                                                     |
| South                                               | 4,790 (40%)                                                  | 1,290 (36%)                                                   |
| West                                                | 2,522 (21%)                                                  | 766 (22%)                                                     |
| Missing                                             | 13                                                           | 9                                                             |
| Hospitalization status at initial COVID-19 illness  |                                                              |                                                               |
| Not hospitalized                                    | 10,612 (89%)                                                 | 3,305 (93%)                                                   |
| Hospitalized                                        | 1,304 (11%)                                                  | 245 (6.9%)                                                    |
| Missing                                             | 8                                                            | 4                                                             |
| Comorbid conditions                                 |                                                              |                                                               |
| Diabetes                                            | 561 (4.7%)                                                   | 119 (3.4%)                                                    |
| Cardiovascular disease/congestive heart failure     | 287 (2.4%)                                                   | 68 (1.9%)                                                     |
| Hypertension                                        | 1,930 (16%)                                                  | 492 (14%)                                                     |
| Chronic kidney disease                              | 97 (0.8%)                                                    | 32 (0.9%)                                                     |
| Cancer                                              | 306 (2.6%)                                                   | 71 (2.0%)                                                     |
| Asthma/reactive airway disease/chronic lung disease | 2,077 (17%)                                                  | 485 (14%)                                                     |

**Supplementary Table 2** Comparison of baseline demographic and clinical characteristics among participants with SARS-CoV-2 infection who agreed and declined to be contacted for future studies<sup>1,2,3,4</sup>

|                                                  | Agreed to be Contacted<br>for Future Studies<br>(n = 11,924) | Declined to be Contacted<br>for Future Studies<br>(n = 3,554) |
|--------------------------------------------------|--------------------------------------------------------------|---------------------------------------------------------------|
| Overweight/obese                                 | 3,670 (31%)                                                  | 969 (27%)                                                     |
| Autoimmune disorder                              | 1,203 (10%)                                                  | 297 (8.4%)                                                    |
| Stroke                                           | 93 (0.8%)                                                    | 14 (0.4%)                                                     |
| Depression/anxiety/other mental health condition | 4,262 (36%)                                                  | 1,171 (33%)                                                   |
| Missing                                          | 1                                                            | 0                                                             |
| Long COVID status at survey completion           |                                                              |                                                               |
| Has long COVID                                   | 7,698 (65%)                                                  | 2,069 (58%)                                                   |
| Does not have long COVID                         | 693 (5.8%)                                                   | 421 (12%)                                                     |
| Cannot be determined <sup>4</sup>                | 3,533 (30%)                                                  | 1,064 (30%)                                                   |

<sup>1</sup>Missing data were due to invalid data, “don’t know” responses, “refuse to answer” responses, and missing responses. Percentages do not add up to 100% due to missing data. The number of missing data varies due to participants dropping out of the survey at different sections.

<sup>2</sup>Baseline data in participants with a history of SARS-CoV-2 infection is as of October 20, 2022.

<sup>3</sup>Limited to participants with a defined long COVID status. Long COVID status was determined using the [WHO definition](#). 320 participants without a defined long COVID status were excluded: 283 provided an initial SARS-CoV-2 infection date before the first confirmed positive test in the United States (January 20, 2020), 28 provided an invalid SARS-CoV-2 infection date, nine did not provide a SARS-CoV-2 infection date nor report experiencing symptoms of COVID-19.

<sup>4</sup>Long COVID status could not be determined because fewer than 12 weeks existed between initial SARS-CoV-2 infection and survey completion.
